# Supplementary material for: FAME (v1.0): a simple module to simulate the effect of planktonic foraminifer species-specific habitat on their oxygen isotopic content
Source: Copernicus journal article supplement (doi:10.5194/gmd-11-3587-2018), 2018-09-03
Supplement: Supplementary file 1 [file gmd-11-3587-2018-supplement.zip]

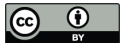

## *Supplement of*

# **FAME (v1.0): a simple module to simulate the effect of planktonic foraminifer species-specific habitat on their oxygen isotopic content**

**Didier M. Roche et al.**

*Correspondence to:* Didier M. Roche ([didier.roche@lsce.ipsl.fr](mailto:didier.roche@lsce.ipsl.fr))

- [gmd-11-3587-2018-supplement-title-page.pdf](#)
- [Supplement\\_v20](#)
  - [Basins\\_WOA\\_version1-acclimate.nc.gz](#)
  - [fame-code-gmd-2017-251.py.gz](#)
  - [forams\\_prod\\_109.py.gz](#)

The copyright of individual parts of the supplement might differ from the CC BY 4.0 License.
